# Supplementary material
Source: publisher figshare collection journal article supplement (https://sage.figshare.com/ndownloader/files/13113275)

Supplementary Figure 1. Individual percentage changes from pre-to-post intervention for quadriceps muscular thickness (Panel A) and thigh circumference (Panel B) in response to passive manipulation with (dark bars) and without (hatched bars) BFR.

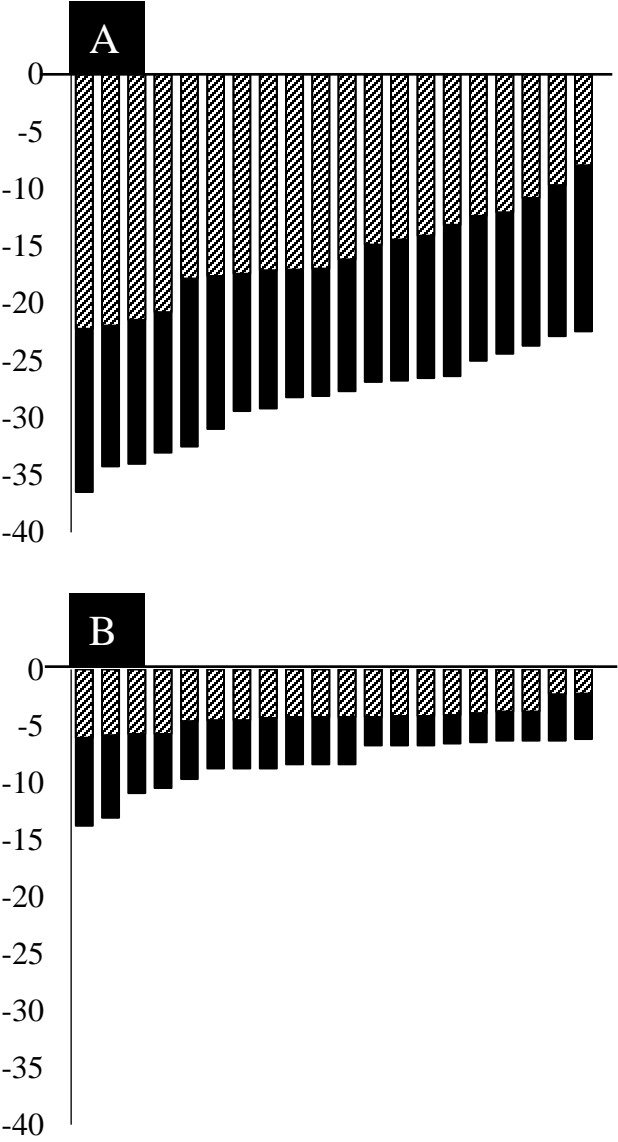

Supplement: Supplementary file 1 [file 13113275]
